# Supplementary material
Source: PubMed Central journal article supplement (PMC3161728)
Supplement: NIHMS314224-supplement-Sup__9.pdf [file NIHMS314224-supplement-Sup__9.pdf]

| PIMUZ lab#2009CM | Clavicle/furcula | Humerus | Radius | Ulna | Metacarpale | Femur | Tibiotarsus | Metatarsals | Fibula | Scapula | Ilium | Dorsal ribs | Coracoid | Phalanges (pes) | Pubis | Phalanges (manus) | Ischium | Cervical centrum | Thoracal centrum | Cervical vertebral arch | Cervical rib | Thoracal vertebral arch | Synsacral centrum | Sternal ribs | Sternum | Synsacral transverse processes | Caudal centra | Caudal neural arches | Pygostyle | Processus uncinatus | Patella |  |
|------------------|------------------|---------|--------|------|-------------|-------|-------------|-------------|--------|---------|-------|-------------|----------|-----------------|-------|-------------------|---------|------------------|------------------|-------------------------|--------------|-------------------------|-------------------|--------------|---------|--------------------------------|---------------|----------------------|-----------|---------------------|---------|--|
| 323              | B                | B       | B      | B    | B           | B     | B           | B           | B      | B       | B     | B           | B        | B               | B     | B                 | B       | B                | B                | B                       | B            | B                       | B                 | B            | B       |                                |               |                      |           |                     |         |  |
| 377              | B                | B       | B      | B    | B           | B     | B           | B           | B      | B       | B     | B           | B        | B               | B     | B                 | B       | B                | B                | B                       | B            | B                       | B                 | B            | B       |                                |               |                      |           |                     |         |  |
| 355              | B                | B       | B      | B    | B           | B     | B           | B           | B      | B       | B     | B           | B        | B               | B     | B                 | B       | B                | B                | B                       | B            | B                       | B                 | B            | B       |                                |               |                      |           |                     |         |  |
| 349              | B                | B       | B      | B    | B           | B     | B           | B           | B      | B       | B     | B           | B        | B               | B     | B                 | B       | B                | B                | B                       | B            | B                       | B                 | B            | B       |                                |               |                      |           |                     |         |  |
| 321              | B                | B       | B      | B    | B           | B     | B           | B           | B      | B       | B     | B           | B        | B               | B     | B                 | B       | B                | B                | B                       | B            | B                       | B                 | B            | B       |                                |               |                      |           |                     |         |  |
| 512              | B                | B       | B      | B    | B           | B     | B           | B           | B      | B       | B     | B           | B        | B               | B     | B                 | B       | B                | B                | B                       | B            | B                       | B                 | B            | B       |                                |               |                      |           |                     |         |  |
| 505              | B                | B       | B      | B    | B           | B     | B           | B           | B      | B       | B     | B           | B        | B               | B     | B                 | B       | B                | B                | B                       | B            | B                       | B                 | B            | B       |                                |               |                      |           |                     |         |  |
| 502              | B                | B       | B      | B    | B           | B     | B           | B           | B      | B       | B     | B           | B        | B               | B     | B                 | B       | B                | B                | B                       | B            | B                       | B                 | B            | B       |                                |               |                      |           |                     |         |  |
| 515              | B                | B       | B      | B    | B           | B     | B           | B           | B      | B       | B     | B           | B        | B               | B     | B                 | B       | B                | B                | B                       | B            | B                       | B                 | B            | B       |                                |               |                      |           |                     |         |  |
| 514              | B                | B       | B      | B    | B           | B     | B           | B           | B      | B       | B     | B           | B        | B               | B     | B                 | B       | B                | B                | B                       | B            | B                       | B                 | B            | B       |                                |               |                      |           |                     |         |  |
